# Supplementary material for: Glycan Degradation (GlyDeR) Analysis Predicts Mammalian Gut Microbiota Abundance and Host Diet-Specific Adaptations
Source: PubMed Central journal article supplement — mBio. 2014 Aug 12;5(4):e01526-14. doi: 10.1128/mBio.01526-14 (PMC4145686; doi:10.1128/mbio.01526-14), 2014-08-12
Supplement: mbo004141933sf01.pdf [file mbo004141933sf01.pdf]

# Figures

a.

| ENTRY | G00010 |      |    | Glycan |
|-------|--------|------|----|--------|
| NODE  | 13     |      |    |        |
| 1     | Asn    | 27   | -2 |        |
| 2     | GlcNAc | 18   | -2 |        |
| 3     | GlcNAc | 9    | -2 |        |
| 4     | Man    | 1    | -2 |        |
| 5     | Man    | -6   | 5  |        |
| 6     | Man    | -6   | -9 |        |
| 7     | Man    | -13  | 10 |        |
| 8     | Man    | -13  | 0  |        |
| 9     | Man    | -13  | -9 |        |
| 10    | Man    | -20  | 10 |        |
| 11    | Man    | -20  | 0  |        |
| 12    | Man    | -20  | -9 |        |
| 13    | Glc    | -27  | -9 |        |
| EDGE  | 12     |      |    |        |
| 1     | 2:b1   | 1    |    |        |
| 2     | 3:b1   | 2:4  |    |        |
| 3     | 4:b1   | 3:4  |    |        |
| 4     | 5:a1   | 4:6  |    |        |
| 5     | 6:a1   | 4:3  |    |        |
| 6     | 7:a1   | 5:6  |    |        |
| 7     | 8:a1   | 5:3  |    |        |
| 8     | 9:a1   | 6:2  |    |        |
| 9     | 10:a1  | 7:2  |    |        |
| 10    | 11:a1  | 8:2  |    |        |
| 11    | 12:a1  | 9:2  |    |        |
| 12    | 13:a1  | 12:3 |    |        |

///

b.

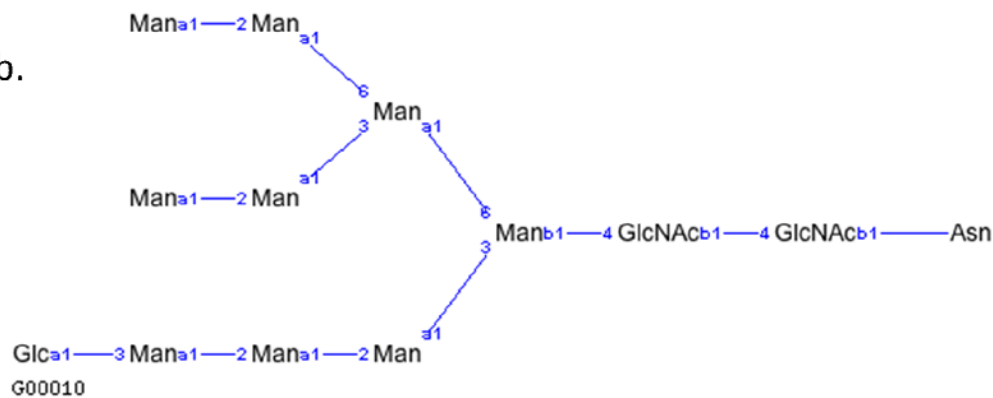

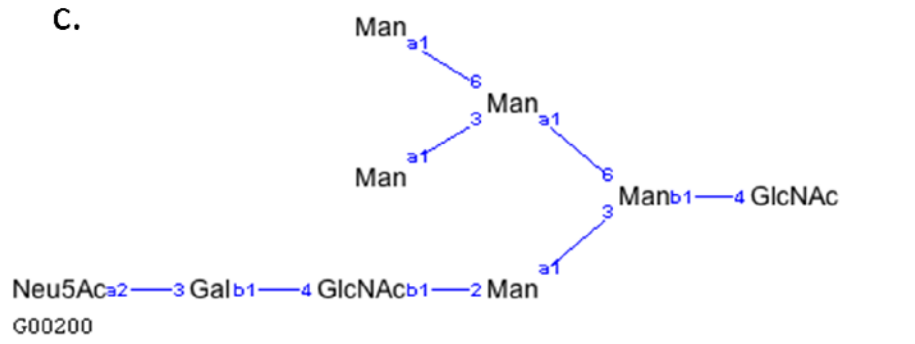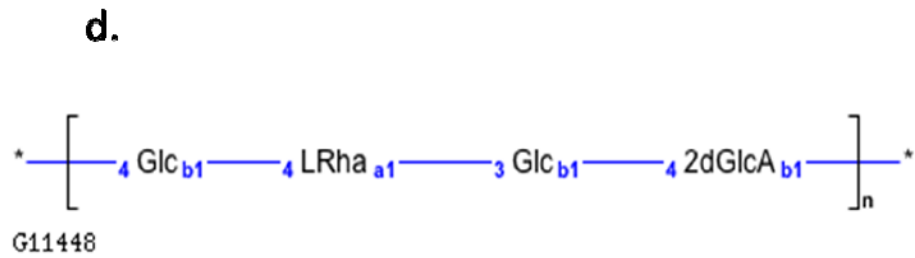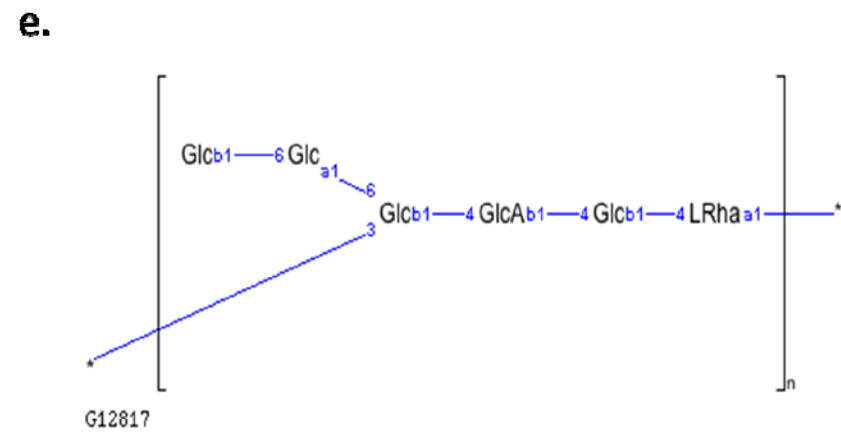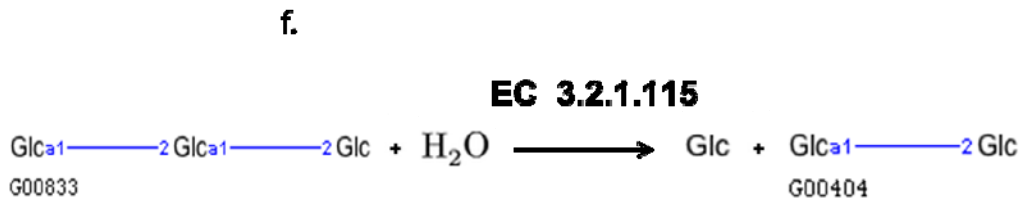

**Supplementary Figure 1: KEGG Glycans.** a-e: Examples of different types of glycans found in the KEGG Glycans database. (a) A textual representation of the KCF graph for glycan G00010. (b) A visual representation of the KCF graph for glycan G00010. (c) A regular glycan. (d) A Linear repeating

glycan. (e) A non linear repeating glycan. (f) Reconstruction of GlyDeR reactions. The GlyDeR algorithm receives a glycan graph structure and an EC number as input and generates the appropriate glycan products, while considering the following rules: Glycosidic linkages hydrolyzed, Endo vs. exo acting enzyme, Degree of polymerization preference, Reducing vs. non-reducing end preference, Contained sub-glycan, Glycan Released. In the example depicted in the figure, these fields had the following values respectively: Glc a1-2 Glc, exo, 10+, non-reducing, unknown, TAU00015 (the glycan ID of glucose).
