# Supplementary material for: Glycan Degradation (GlyDeR) Analysis Predicts Mammalian Gut Microbiota Abundance and Host Diet-Specific Adaptations
Source: PubMed Central journal article supplement — mBio. 2014 Aug 12;5(4):e01526-14. doi: 10.1128/mBio.01526-14 (PMC4145686; doi:10.1128/mbio.01526-14), 2014-08-12
Supplement: mbo004141933sf03.pdf [file mbo004141933sf03.pdf]

a.

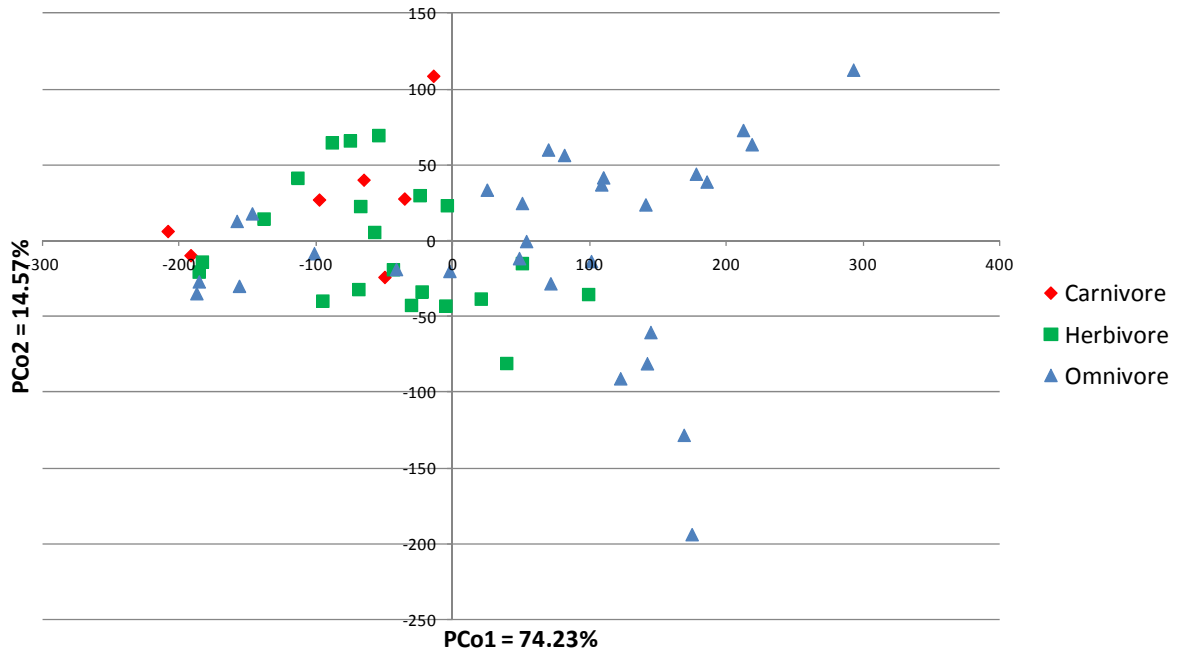

b.

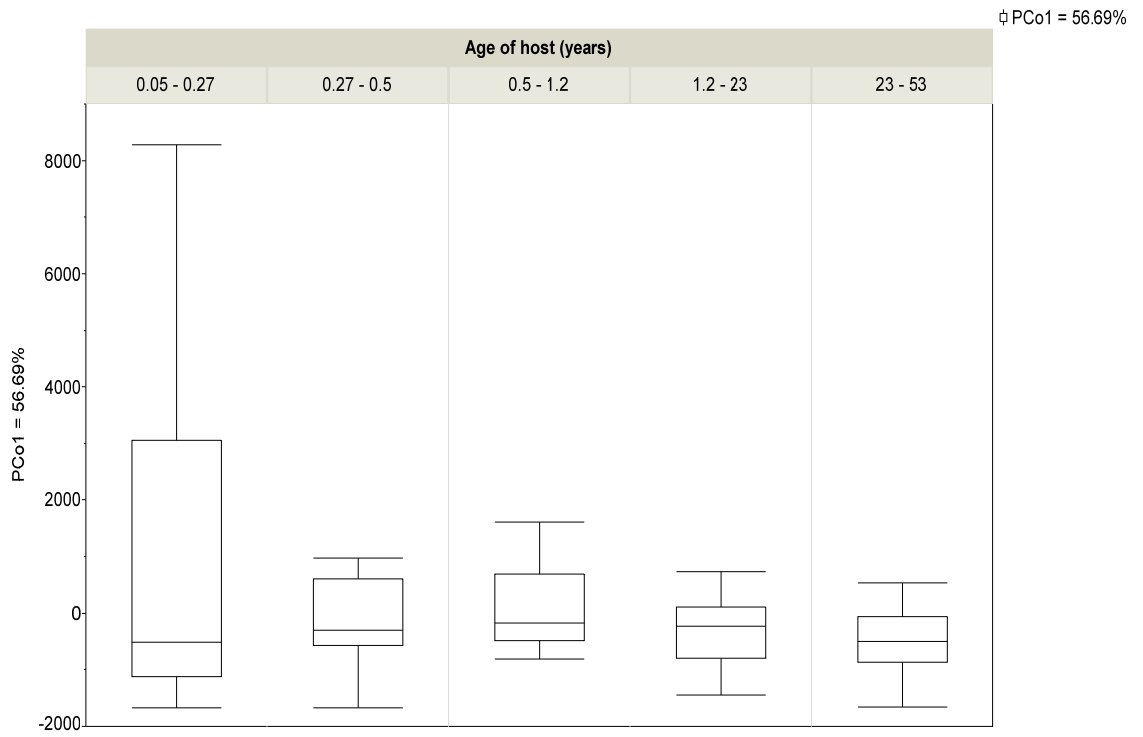

C.

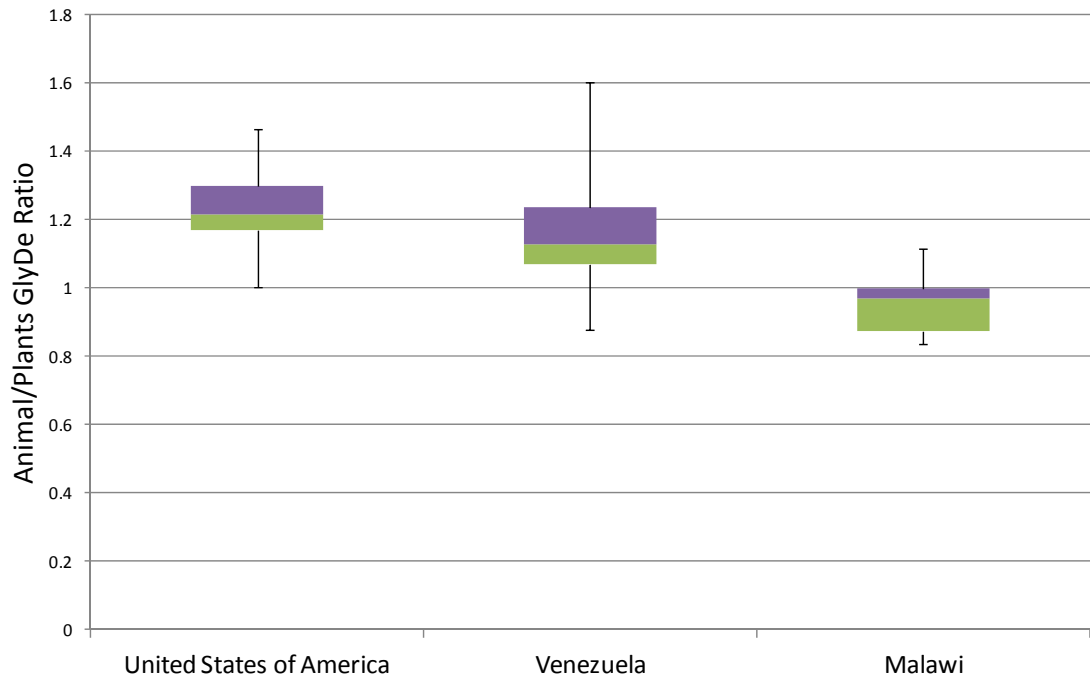

**Supplementary Figure 3: The connection between glycan degradation and diet.** (a) The Muegge et. al. dataset. Principal Coordinate Analysis of the GlyDeR profiles of all the samples. The first principal coordinate shows a gradient is formed starting from Herbivores (red) to Omnivores (green) and Carnivores (blue). (b & c) The Yatsunenکو et. al. dataset. (b) The box plots represents the variation in GlyDeR profiles of the samples over the first principal coordinate and separated into bins according to the age of the host. (c) Box plots showing the differences between the Animal to Plants-specific GlyDeR score ratios of adults in Malawi, Venezuela and United States of America.

- Zivkovic A, German J, Lebrilla C, Mills D.** 2011. Human milk glycobiome and its impact on the infant gastrointestinal microbiota. *Proceedings of the National Academy of Sciences of the United States of America* **108 Suppl 1**:4653-4658. 1.
- Aziz R, Devoid S, Disz T, Edwards R, Henry C, Olsen G, Olson R, Overbeek R, Parrello B, Pusch G, Stevens R, Vonstein V, Xia F.** 2012. SEED servers: high-performance access to the SEED genomes, annotations, and metabolic models. *PloS one* **7**. 2.
